# Supplementary material for: Synergy between RecBCD subunits is essential for efficient DNA unwinding
Source: eLife. 2019 Jan 2;8:e40836. doi: 10.7554/eLife.40836 (PMC6338465; doi:10.7554/eLife.40836)
Supplement: Supplementary file 1. [file elife-40836-supp1.docx]

**Supplementary Table 1:** All the possible mechano-chemical models.

| Model | **Reaction scheme** |
| --- | --- |
| PS at Binding |  |
| PS at hydrolysis |  |
| PS at release |  |
| BR before binding |  |
| BR before hydrolysis |  |
| BR before release |  |
