# Supplementary material for: Synergy between RecBCD subunits is essential for efficient DNA unwinding
Source: eLife. 2019 Jan 2;8:e40836. doi: 10.7554/eLife.40836 (PMC6338465; doi:10.7554/eLife.40836)
Supplement: Supplementary file 2. [file elife-40836-supp2.docx]

**Supplementary Table 2:** Force-dependent Michaelis Menten parameters for the different models of unwinding, for experiments measuring activity against an opposing force.

| **Model** |  | **Eq.** |  | **Eq.** |
| --- | --- | --- | --- | --- |
| PS at Binding |  | (S1) |  | (S2) |
| PS at hydrolysis |  | (S3) |  | (S4) |
| PS at release |  | (S5) |  | (S6) |
| BR before binding |  | (S7) |  | (S8) |
| BR before hydrolysis |  | (S9) |  | (S10) |
| BR before release |  | (S11) |  | (S12) |
