# Supplementary material for: Synergy between RecBCD subunits is essential for efficient DNA unwinding
Source: eLife. 2019 Jan 2;8:e40836. doi: 10.7554/eLife.40836 (PMC6338465; doi:10.7554/eLife.40836)
Supplement: Supplementary file 6. [file elife-40836-supp6.docx]

**Supplementary Table 6:** Results of fitting RecD force velocity curves to a Brownian ratchet before hydrolysis model, in complex and isolated.

| Parameter | Isolated RecD | RecD in complex |
| --- | --- | --- |
|  |  |  |
|  |  |  |
|  |  |  |
|  |  |  |
|  |  |  |
|  |  |  |
|  |  |  |
