# Supplementary figures and images for: Synergy between RecBCD subunits is essential for efficient DNA unwinding
Source: eLife journal article supplement (doi:10.7554/elife.40836), 2019-01-02

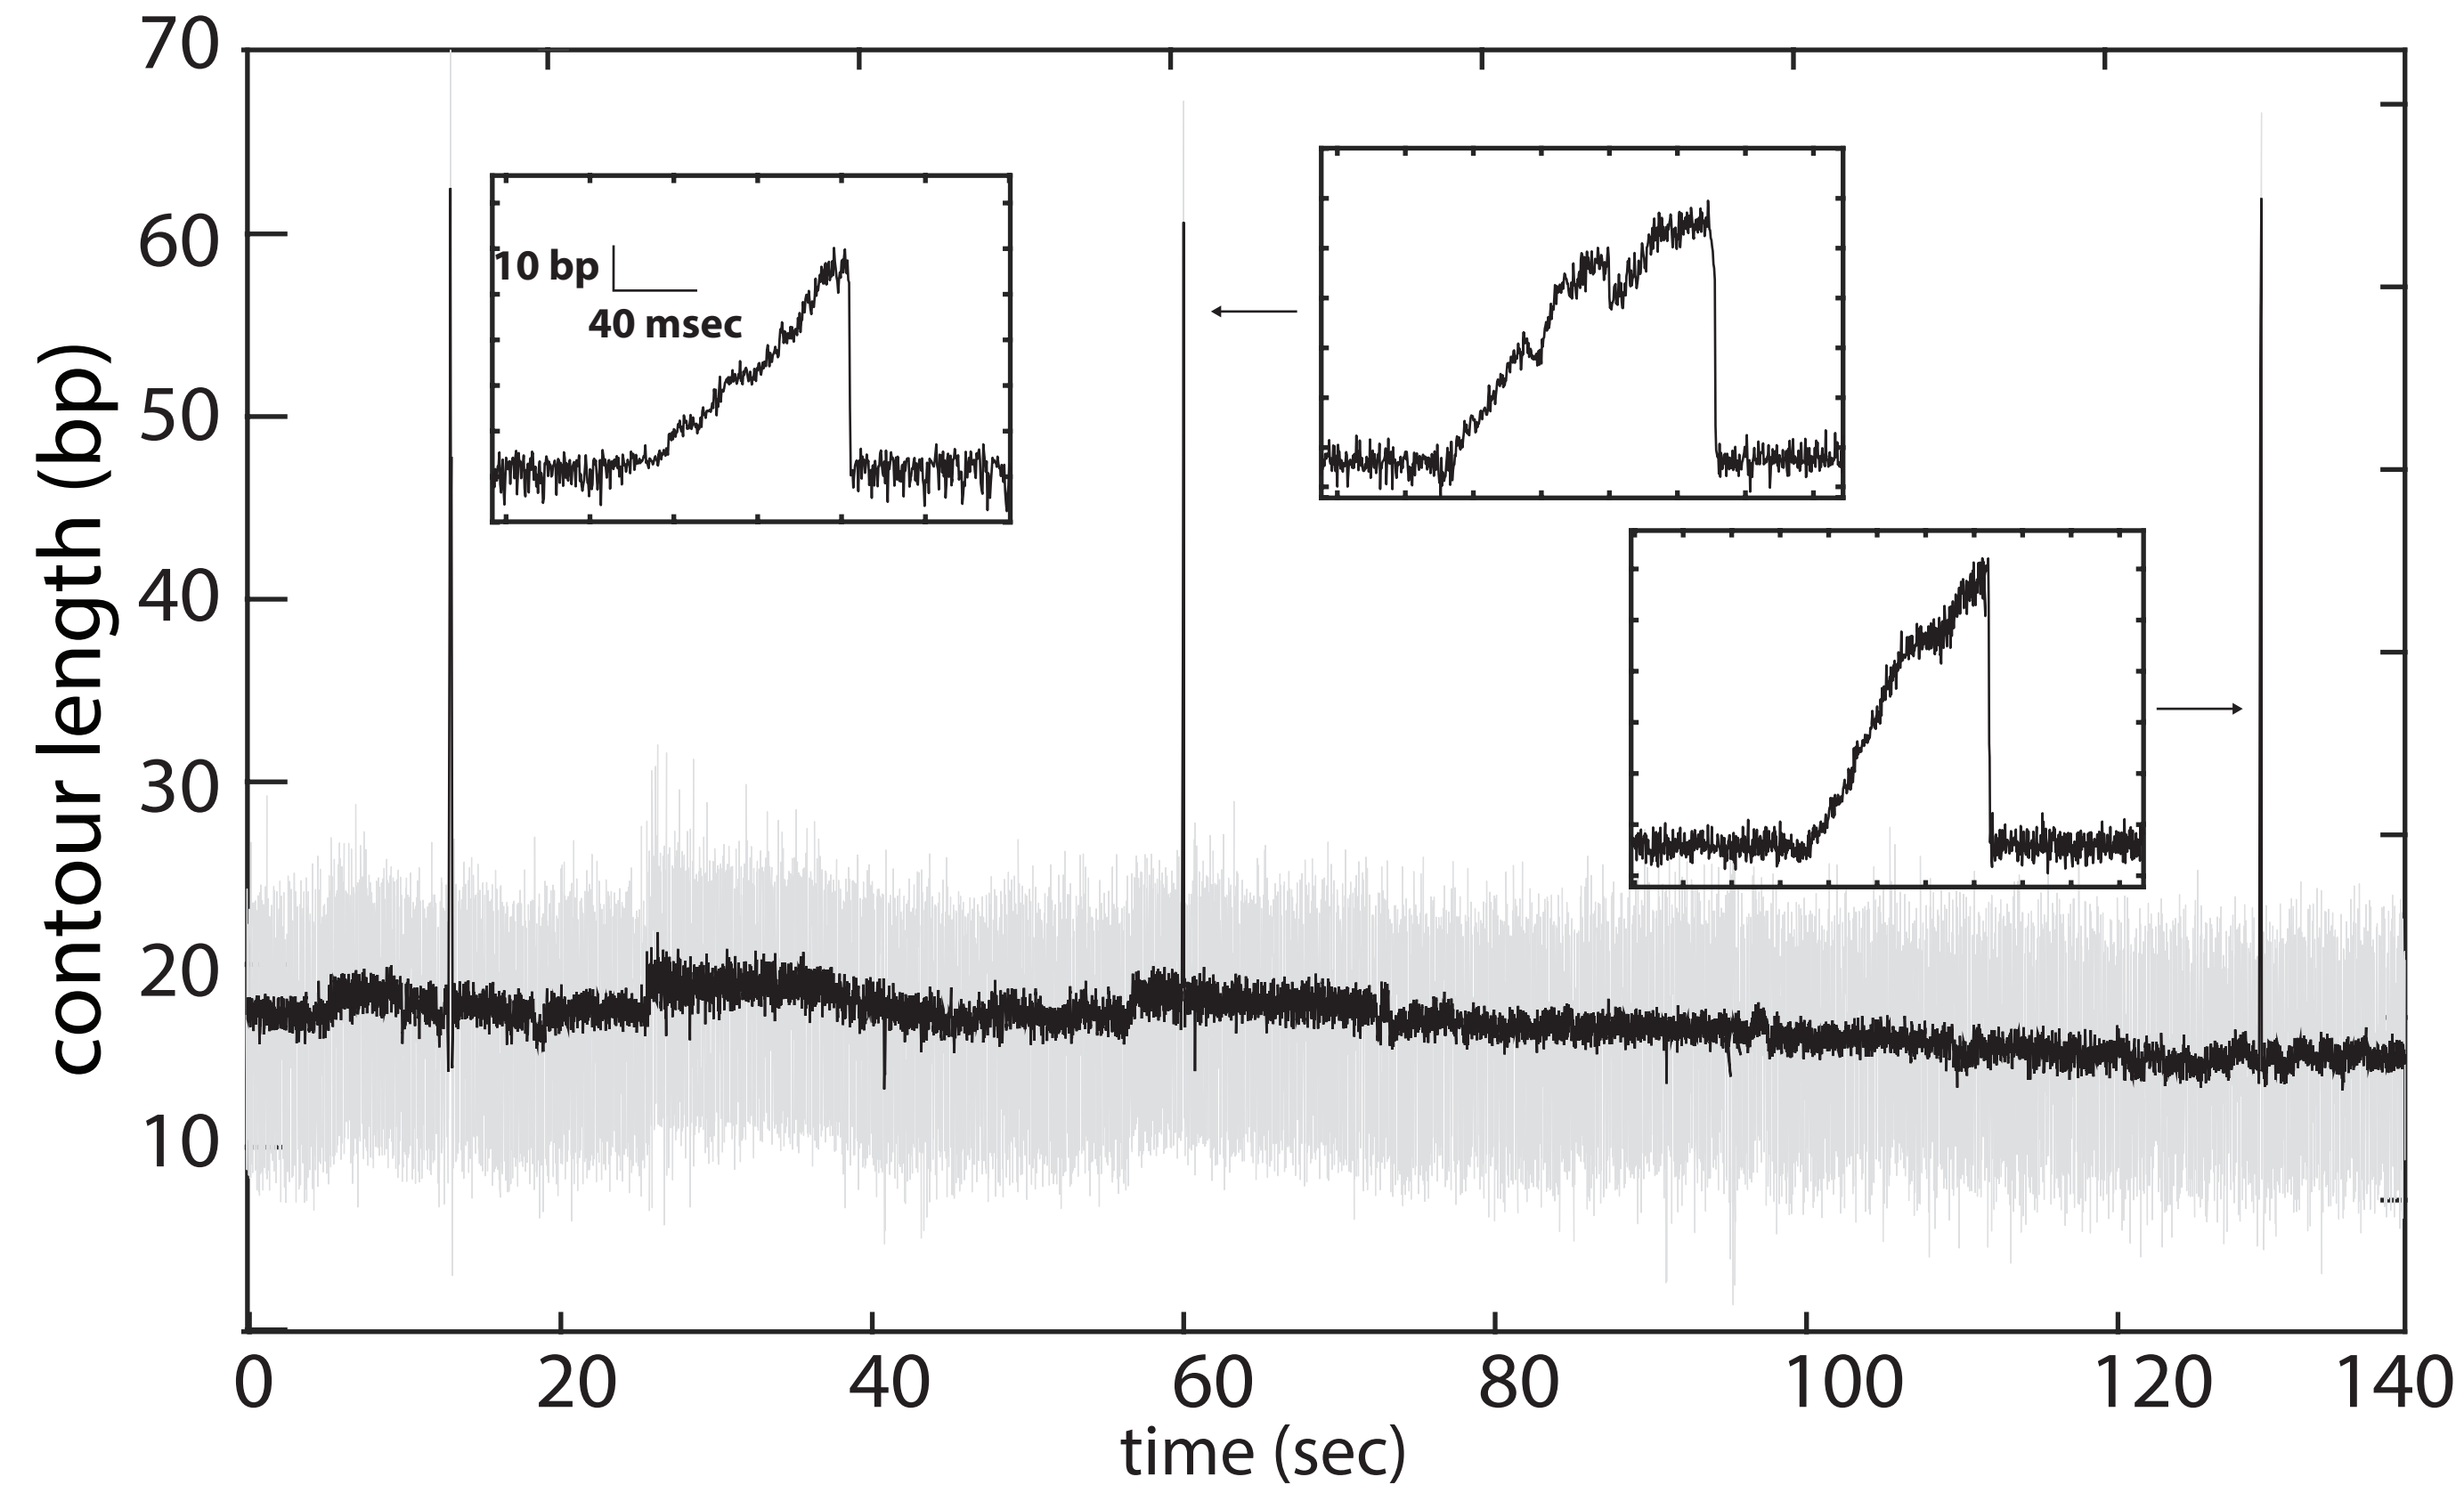

Supplement: supp [file elife-40836-supp-v1.zip]

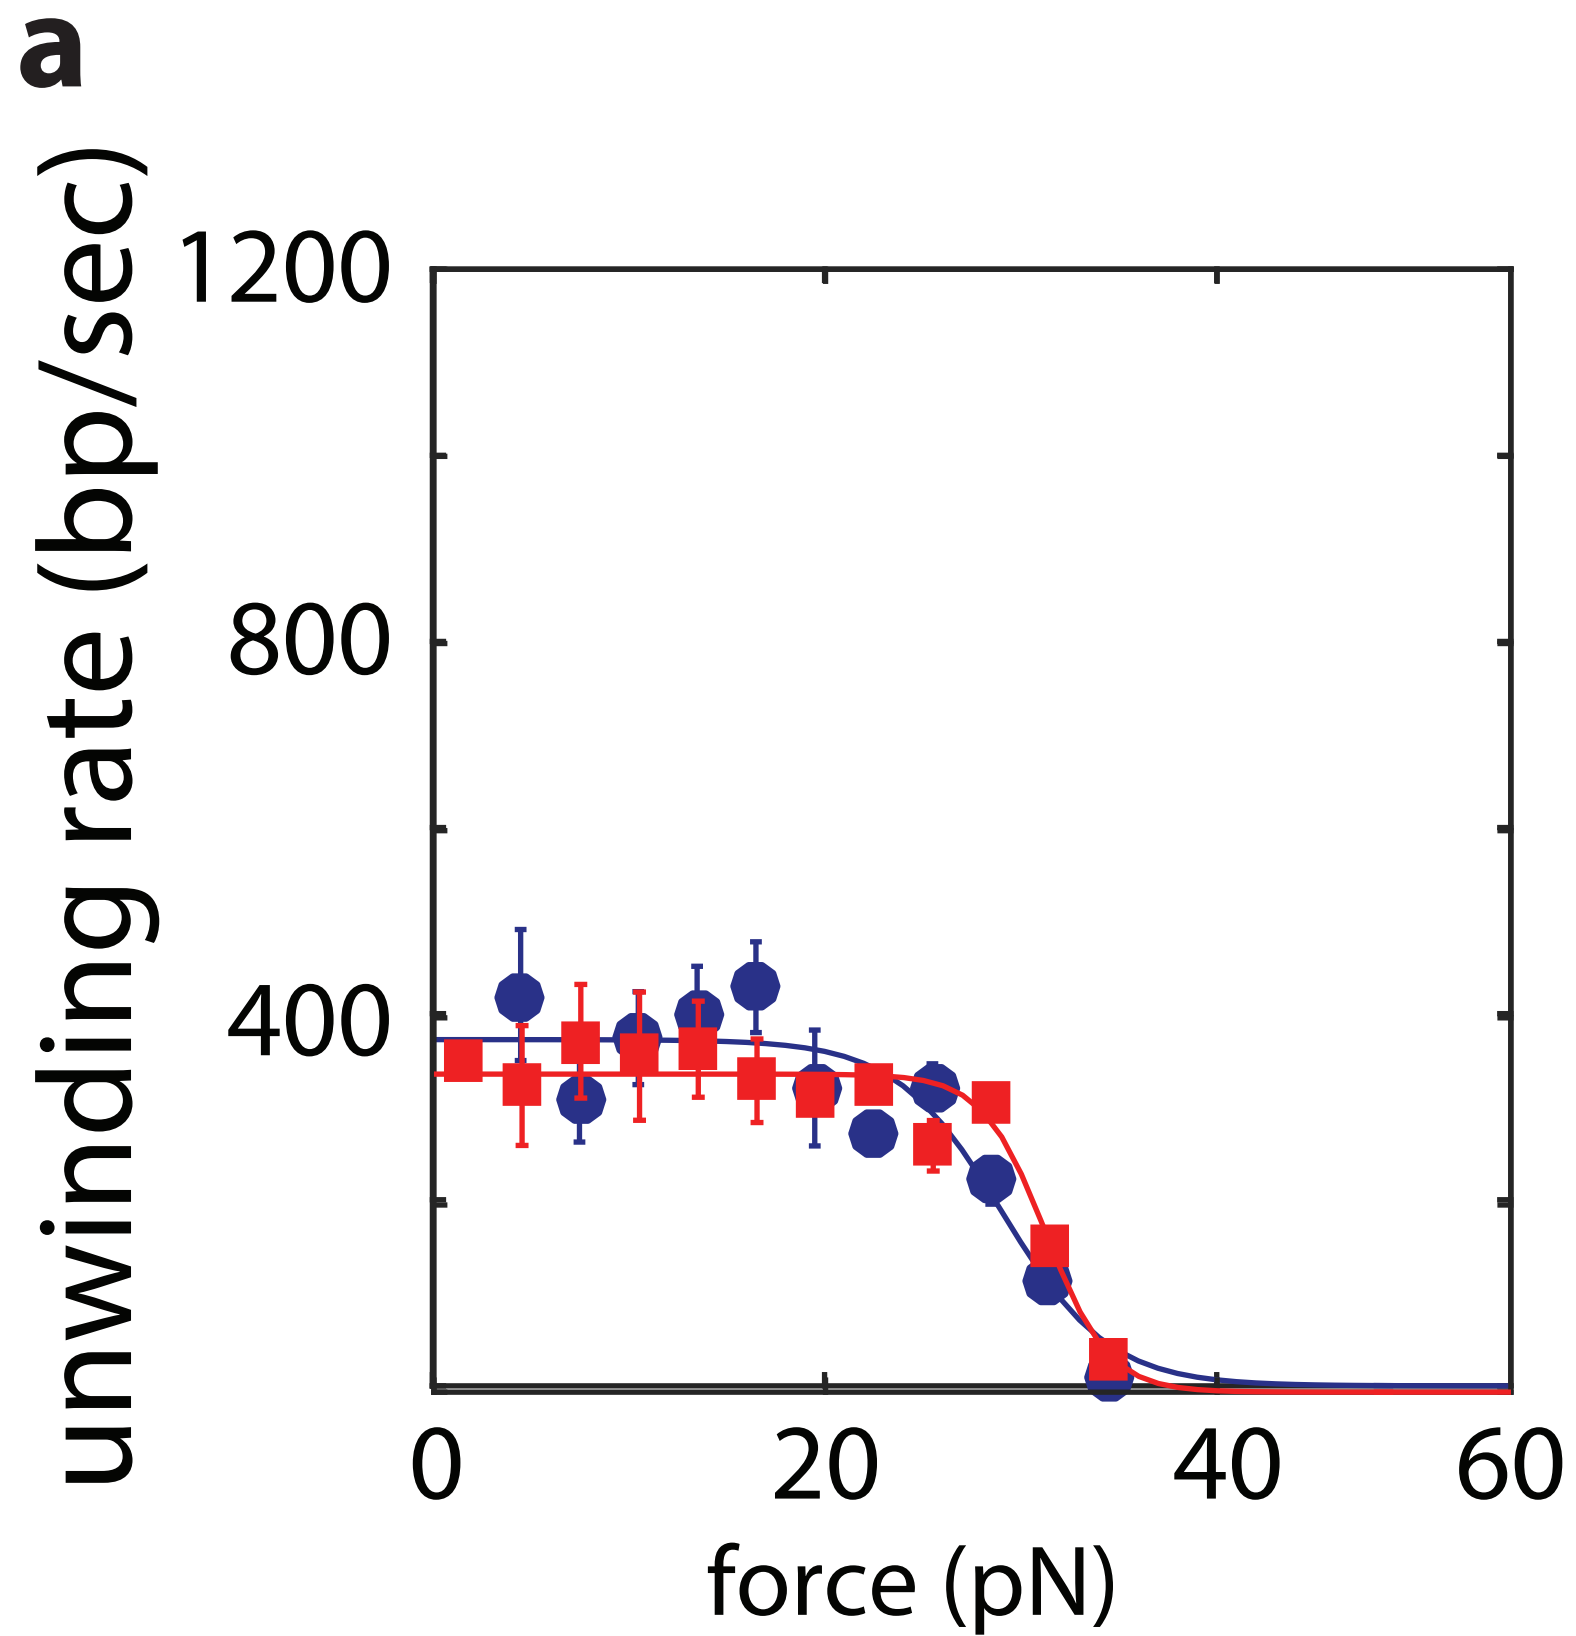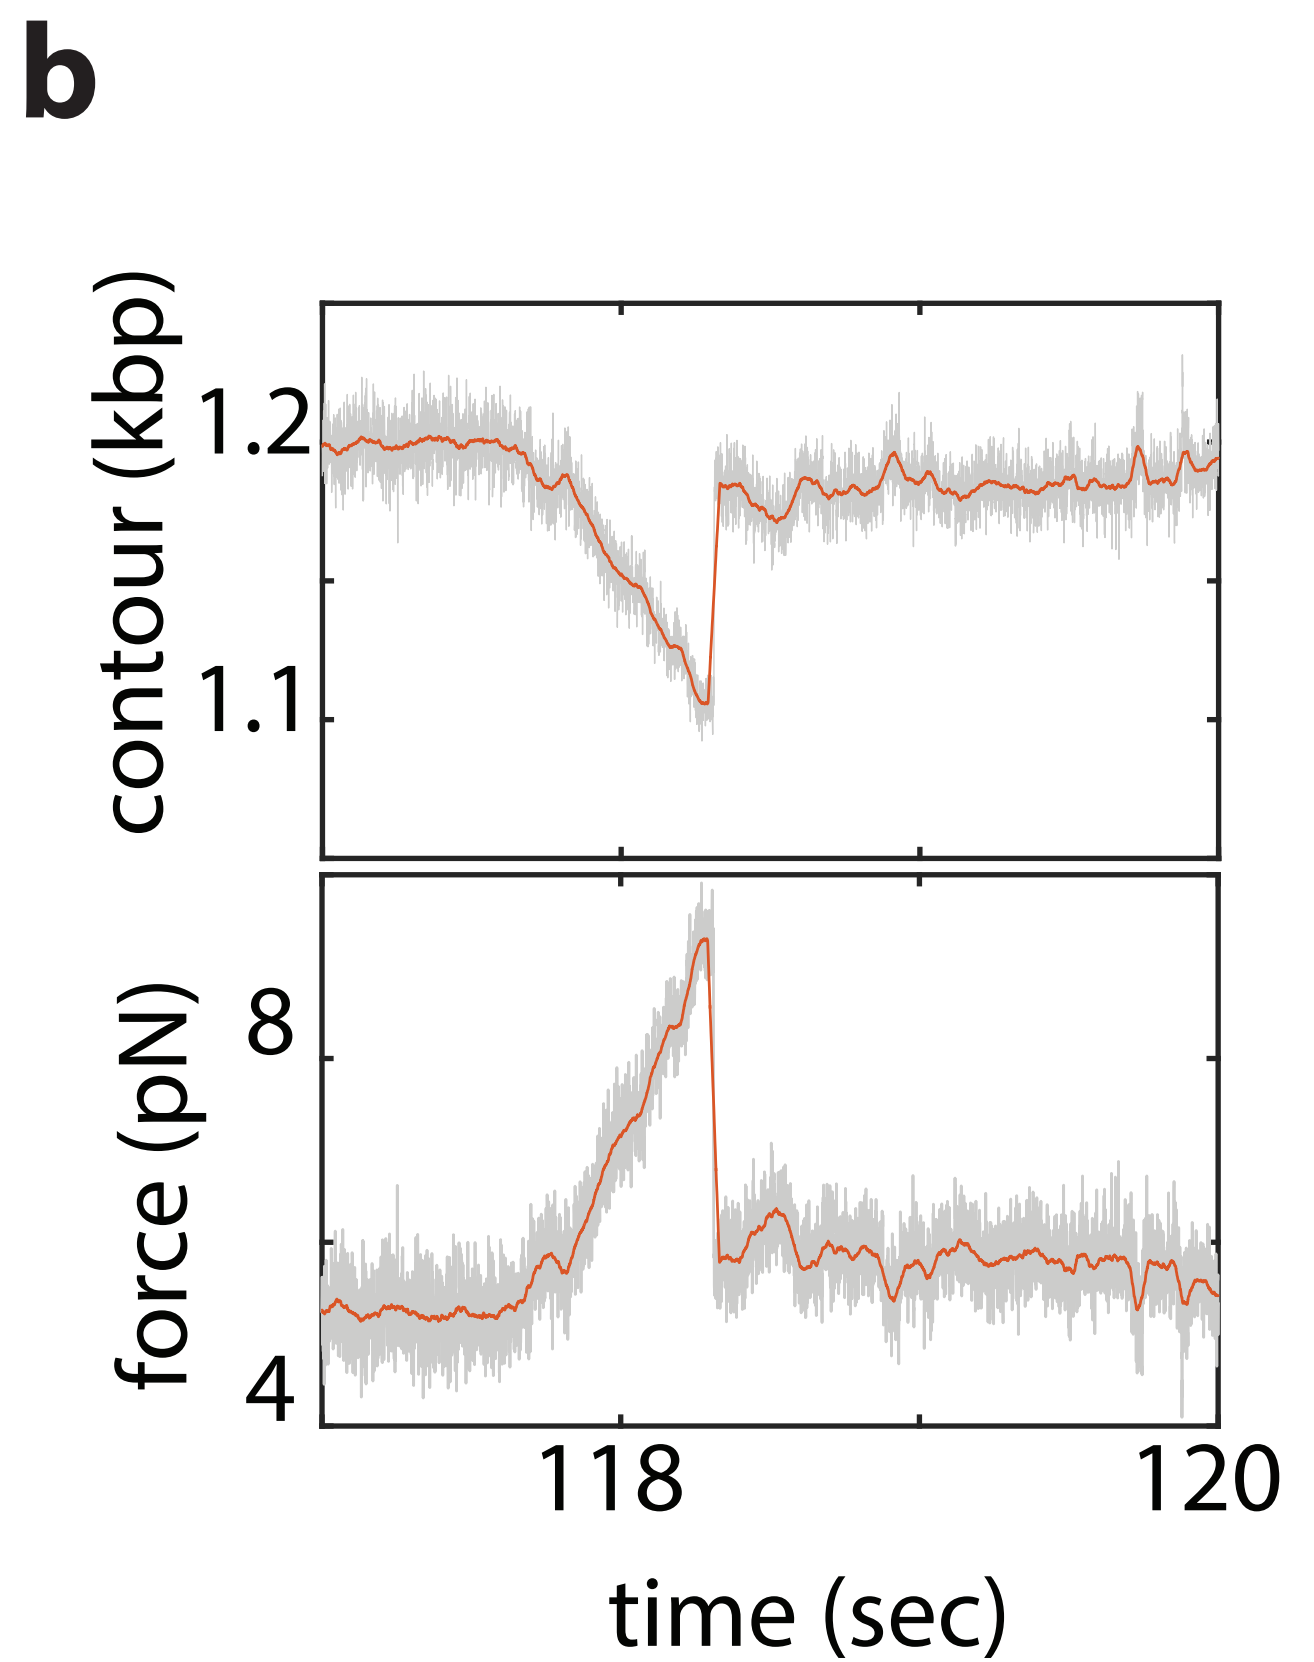

Supplement: supp [file elife-40836-supp-v1.zip]

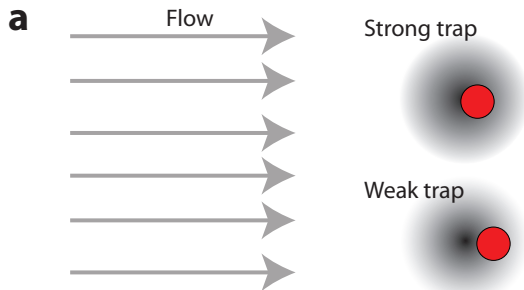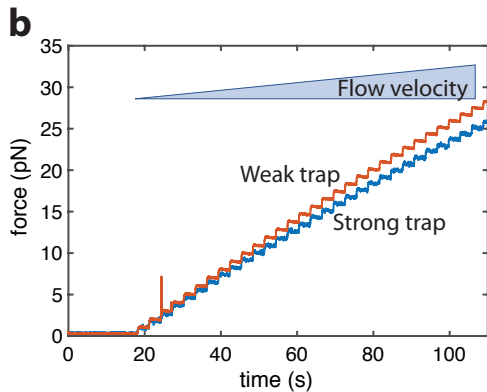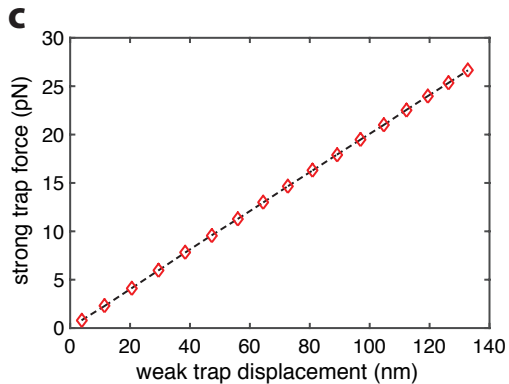

Supplement: supp [file elife-40836-supp-v1.zip]

**a**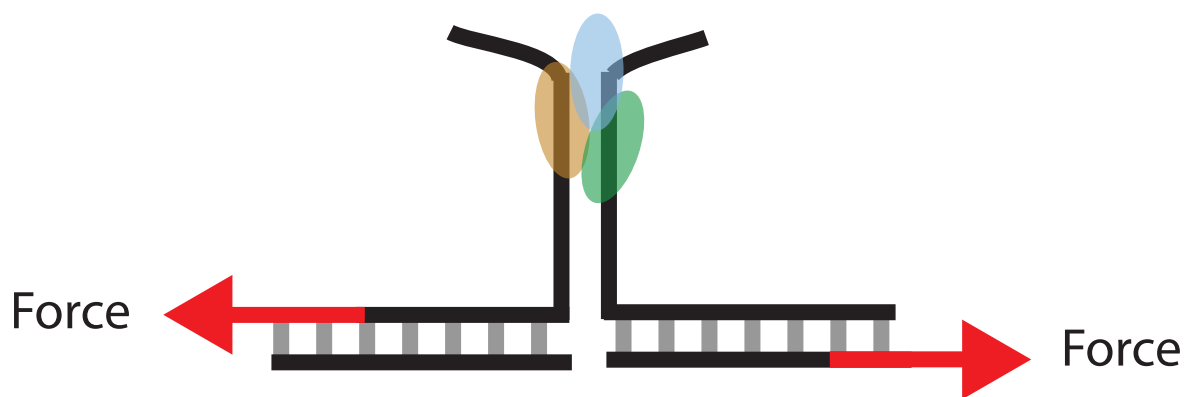**b**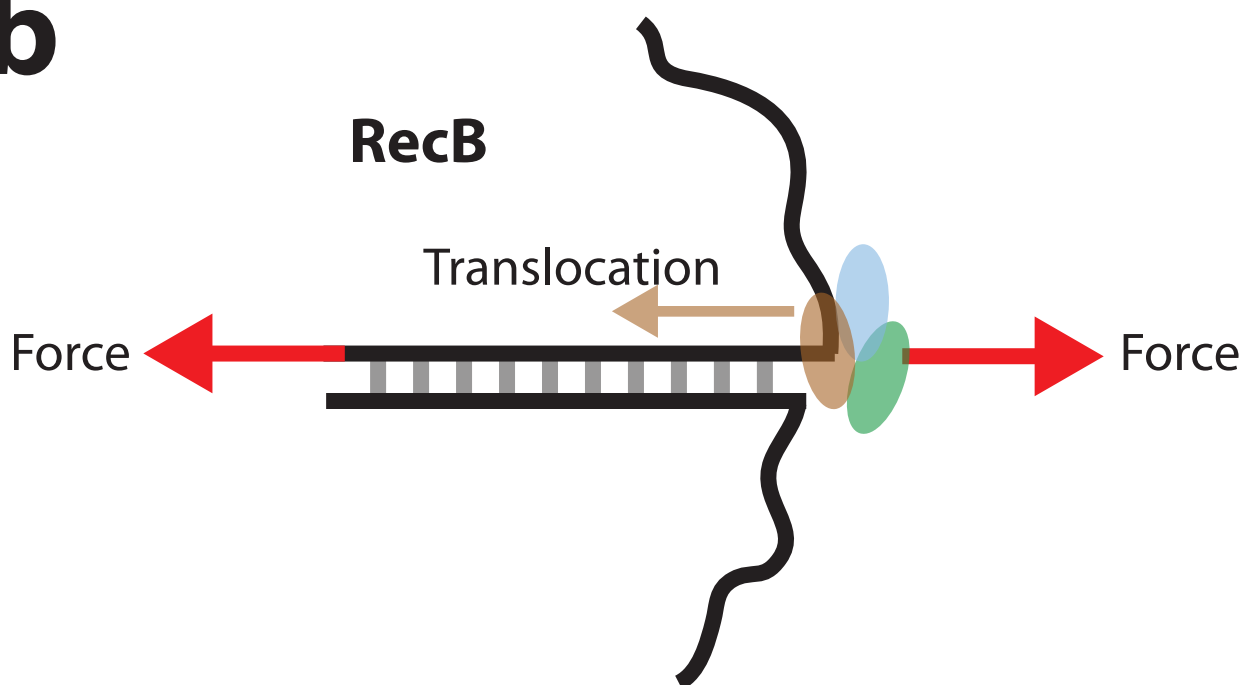**c**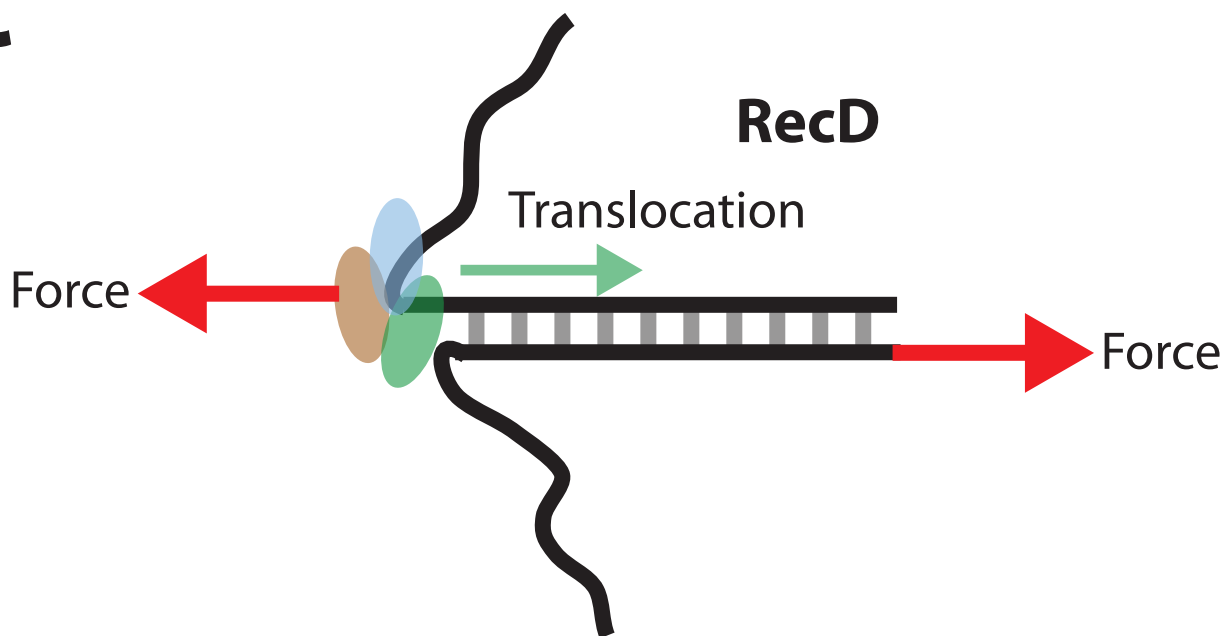

Supplement: supp [file elife-40836-supp-v1.zip]

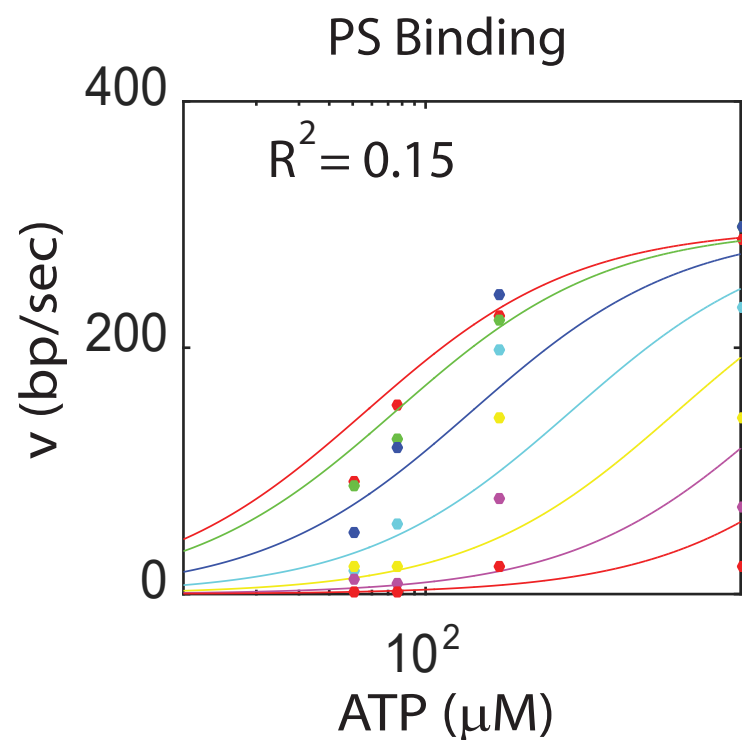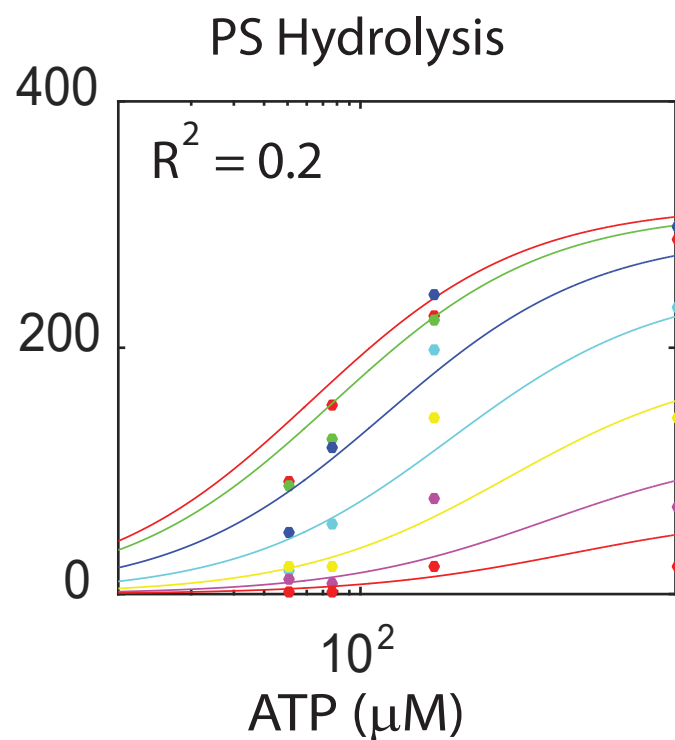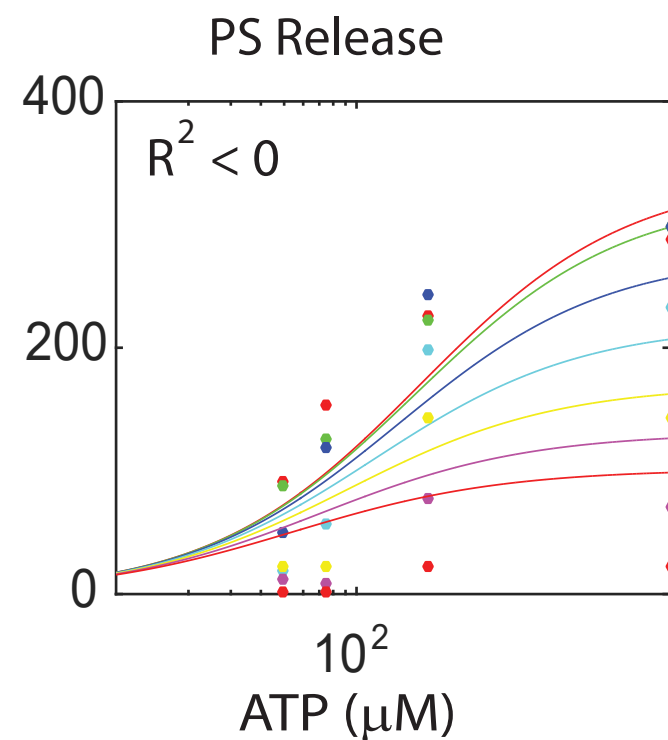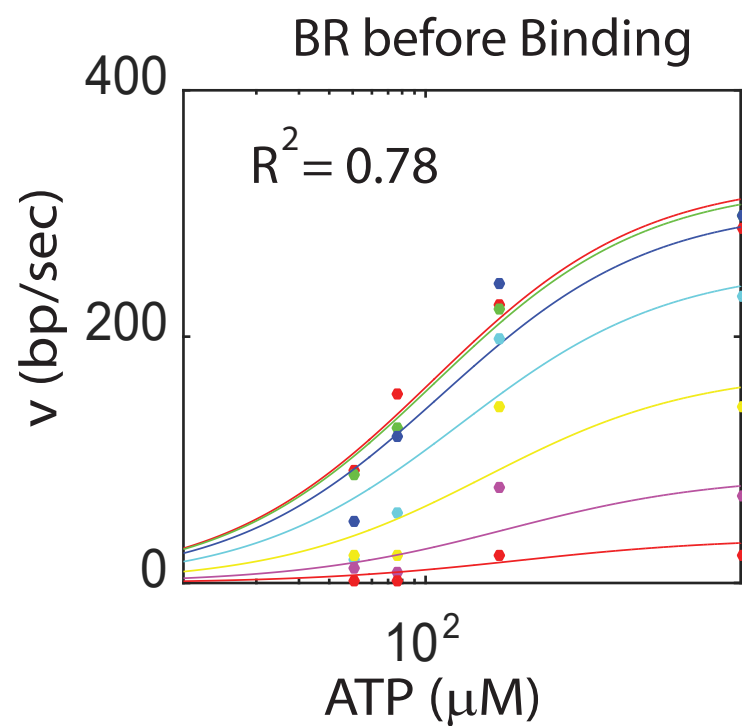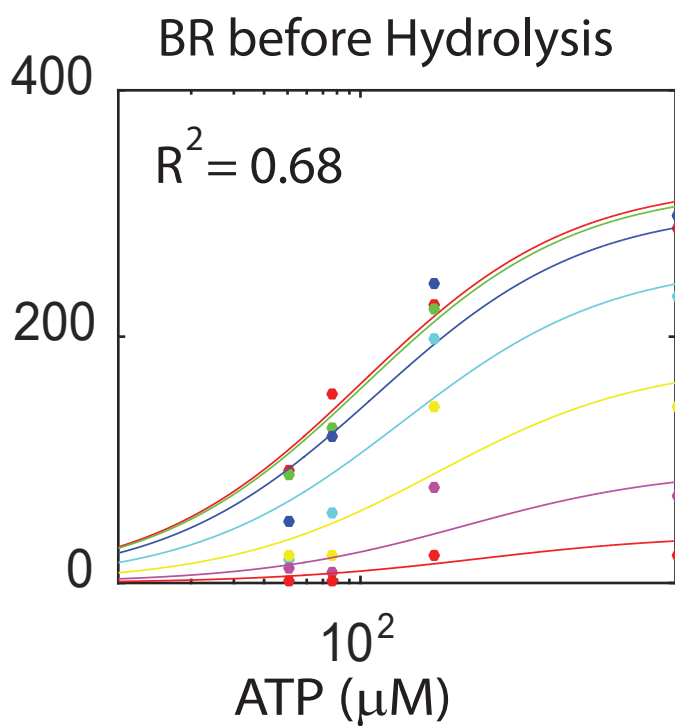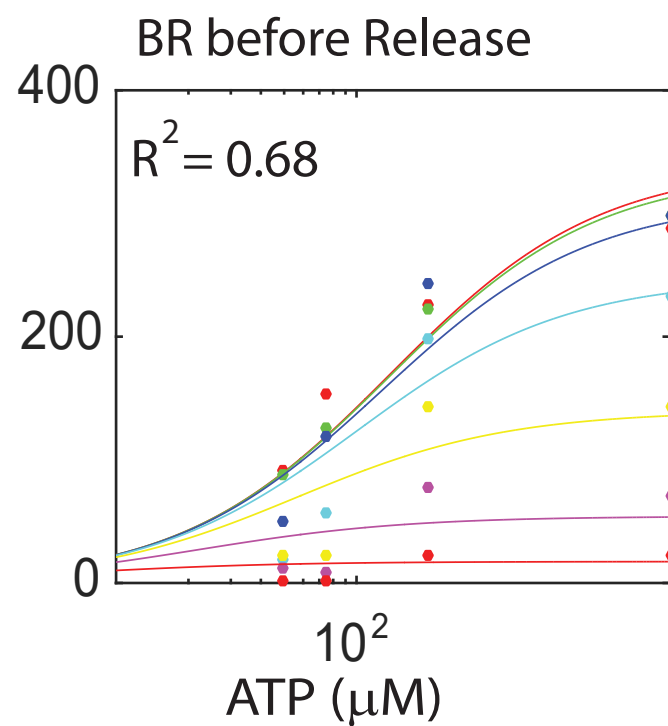

Supplement: supp [file elife-40836-supp-v1.zip]

PS Binding

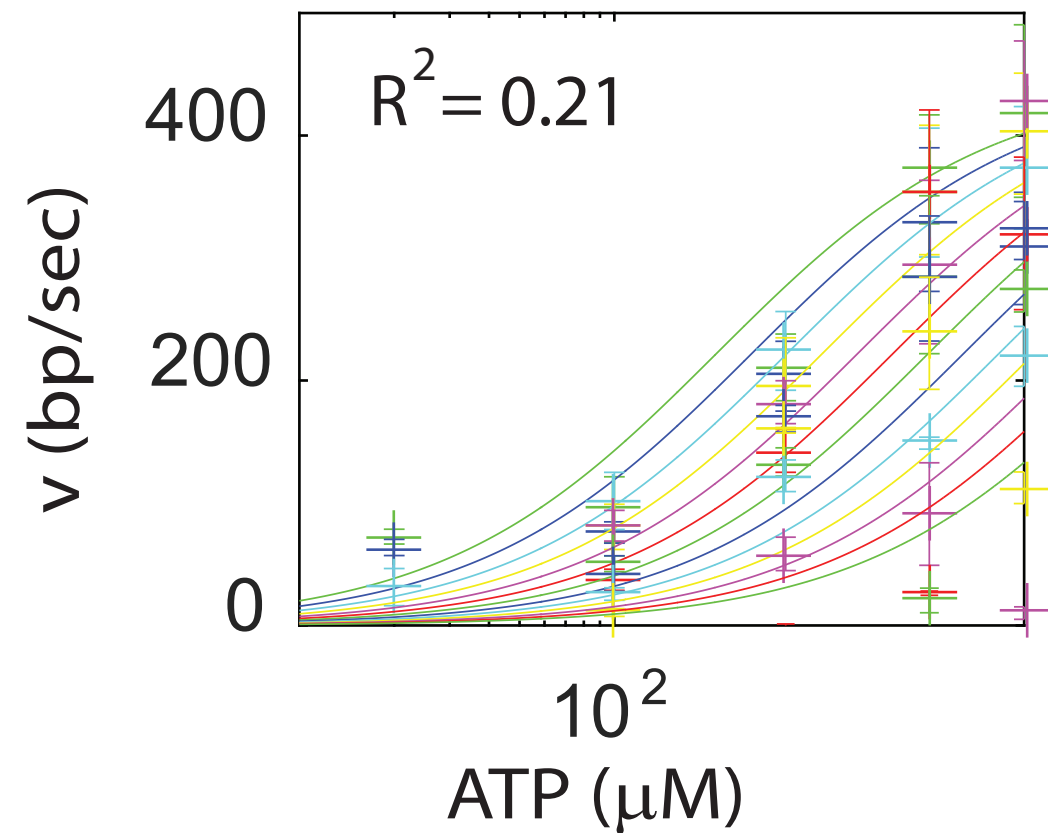

PS Hydrolysis

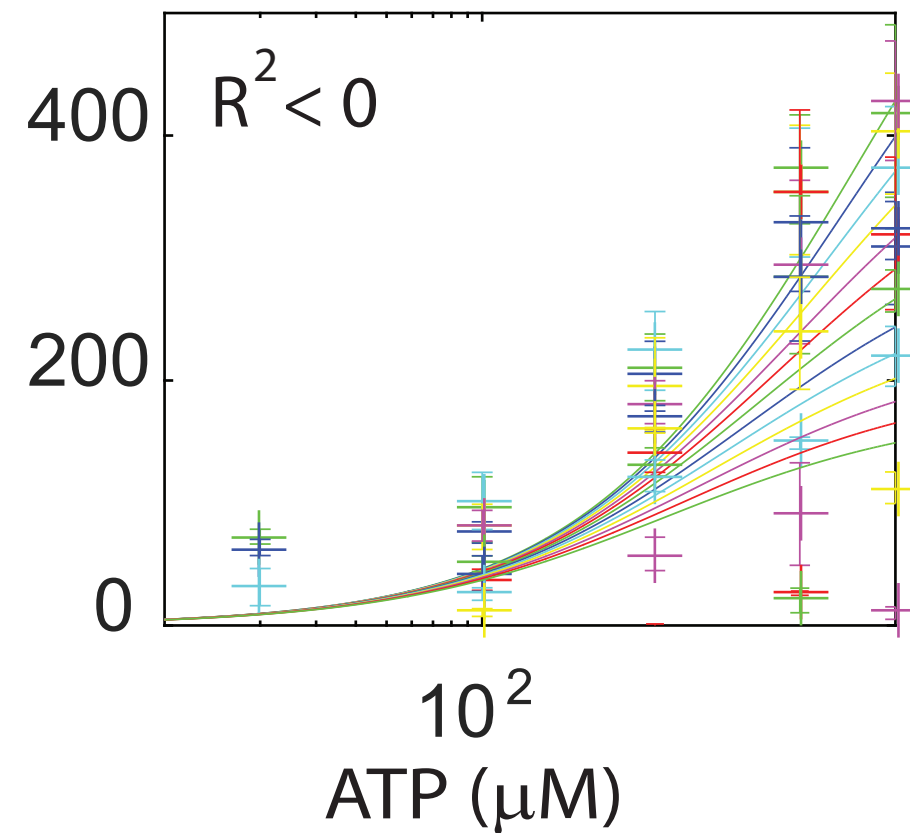

PS Release

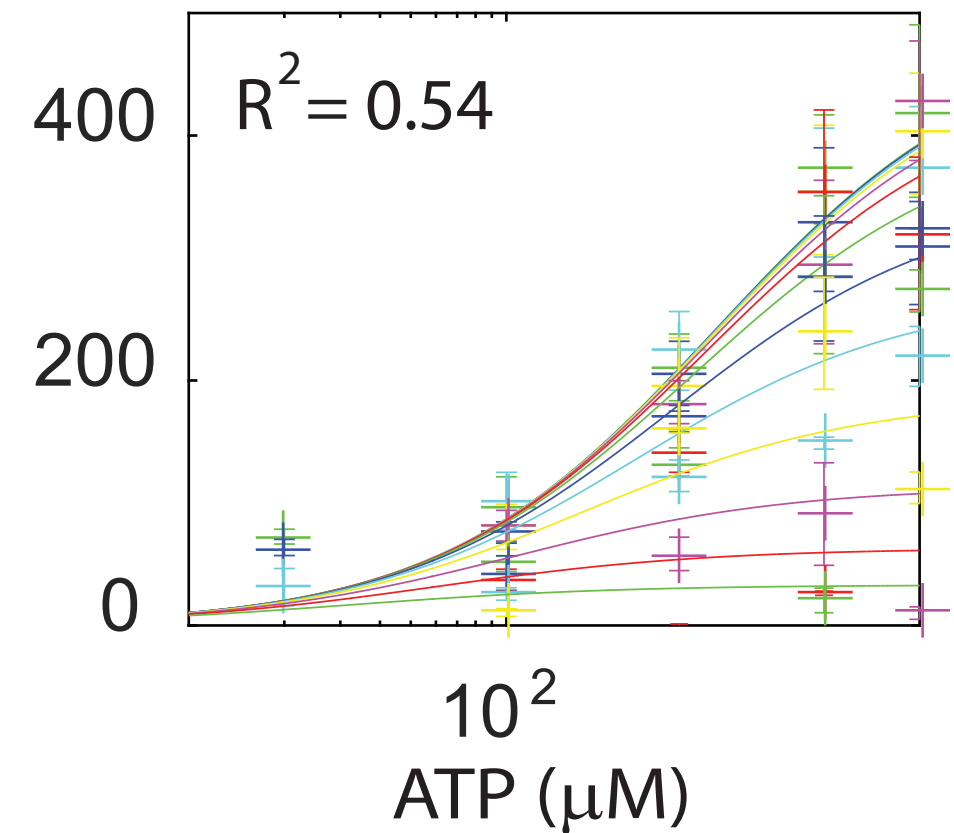

BR before Binding

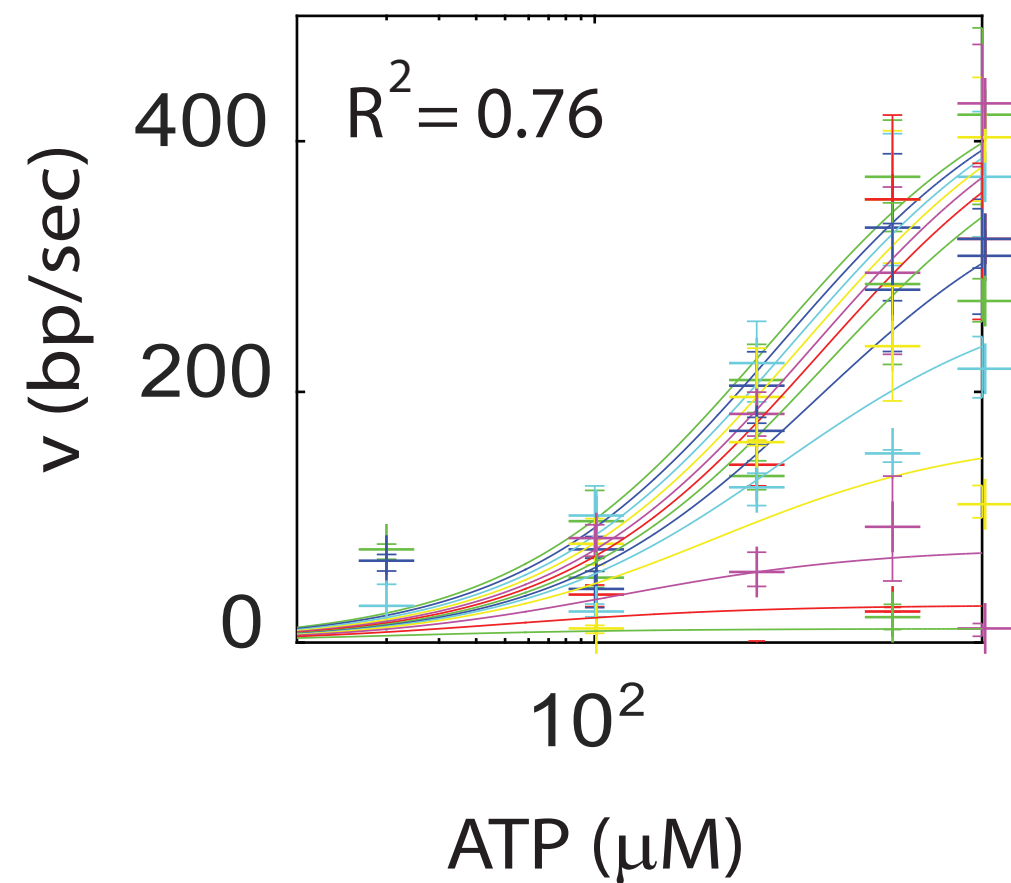

BR before Hydrolysis

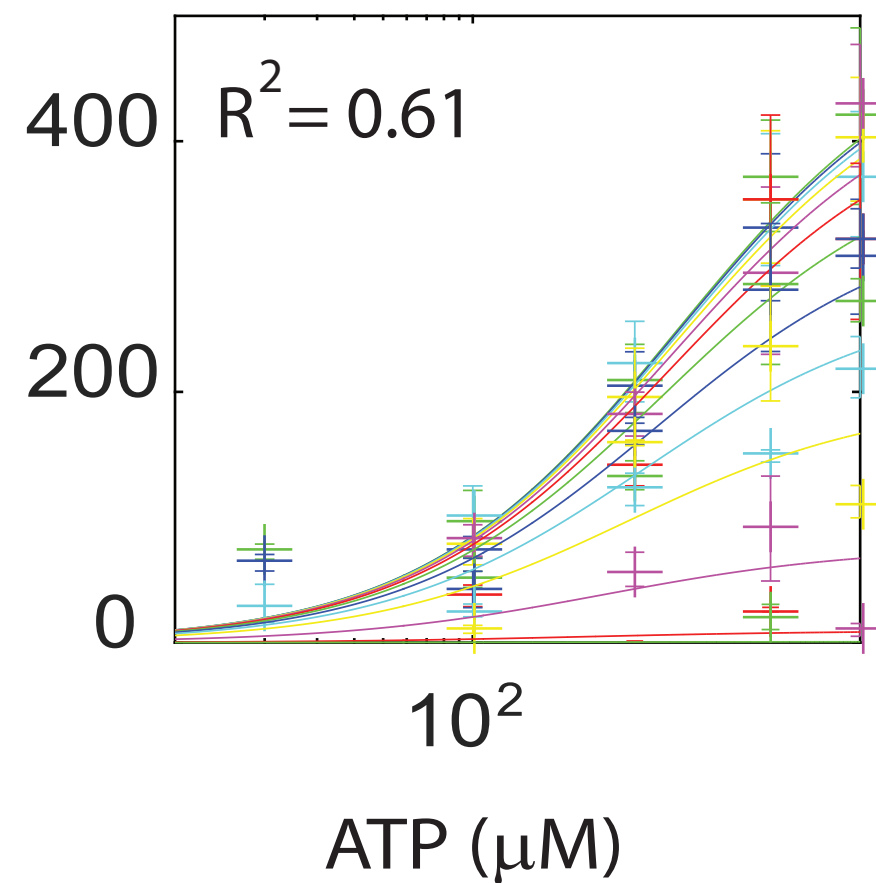

BR before Release

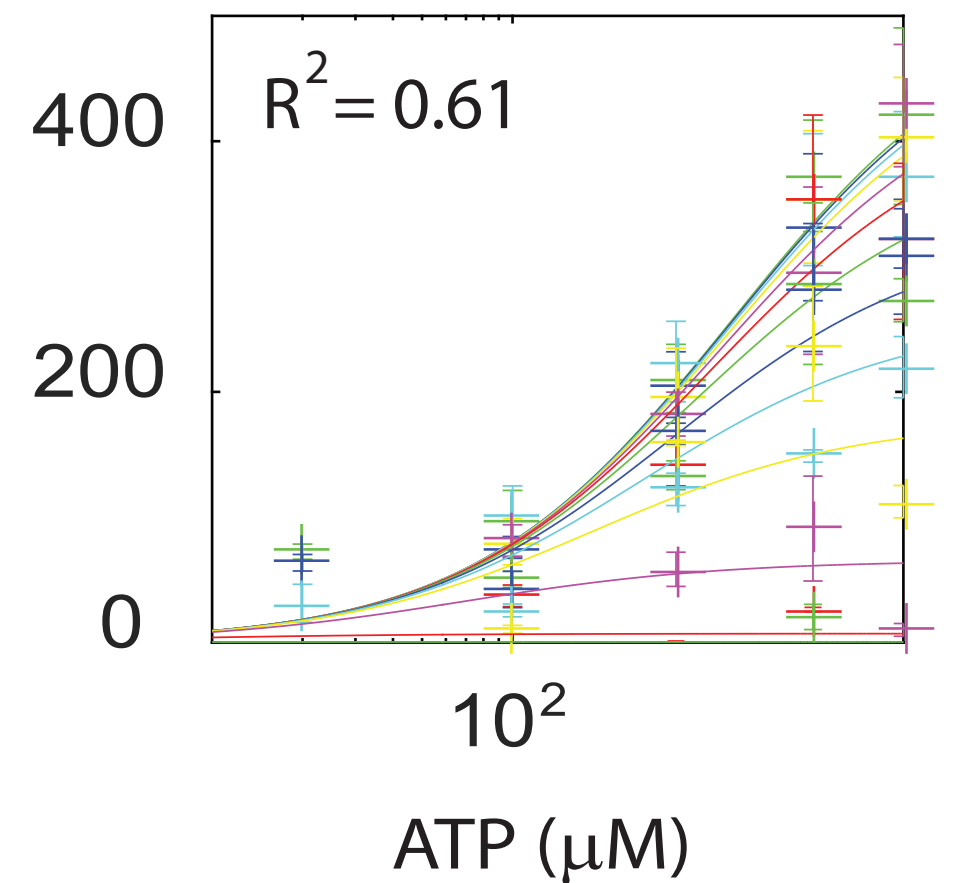

Supplement: supp [file elife-40836-supp-v1.zip]
